# Supplementary figures and images for: Synergistic advancements in high-performance flexible capacitive pressure sensors: structural modifications, AI integration, and diverse applications
Source: Royal Society of Chemistry journal article supplement (doi:10.1039/d3nr05155b), 2024-01-01

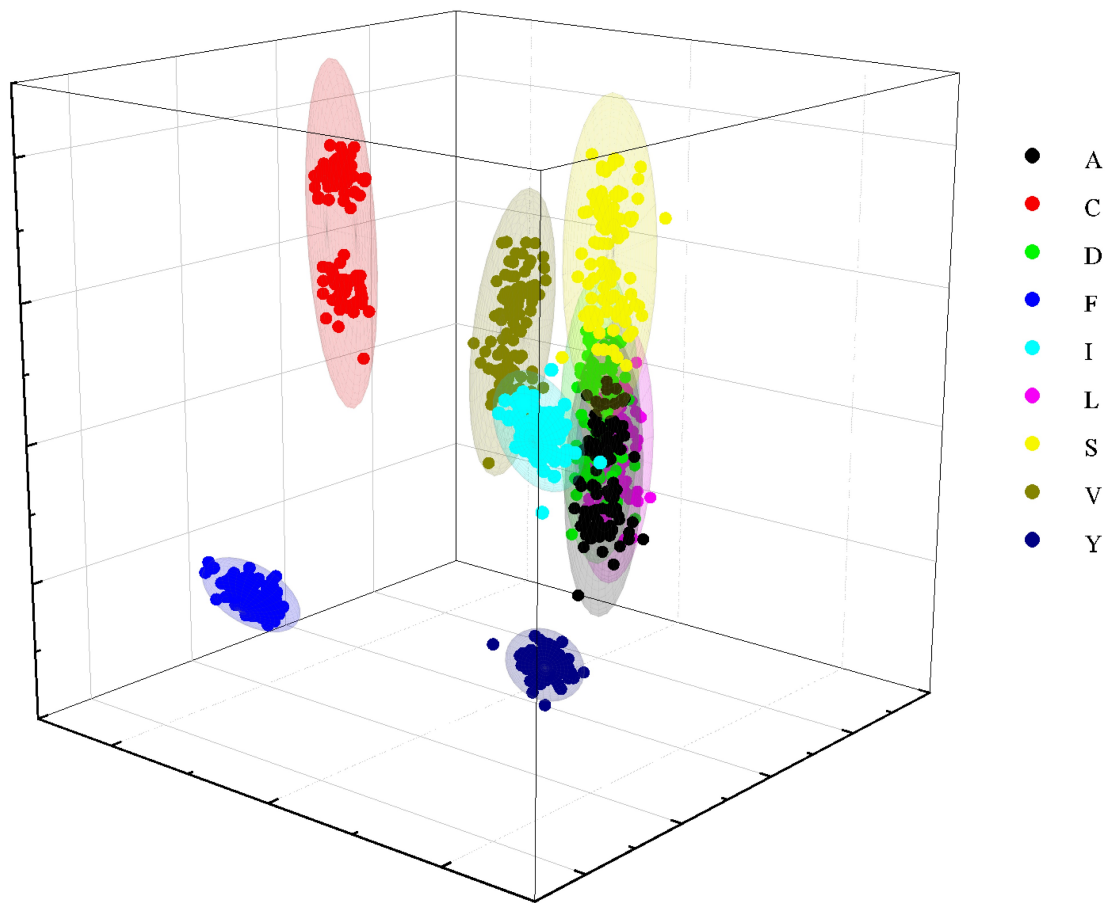

Supplement: d3nr05155b10.pdf [file d3nr05155b10.pdf]

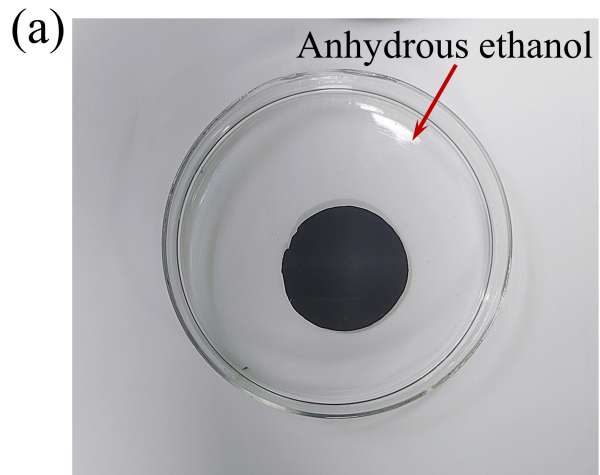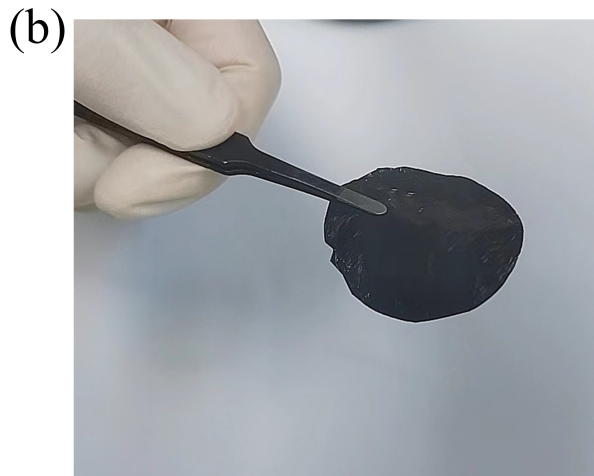

Supplement: d3nr05155b11.pdf [file d3nr05155b11.pdf]

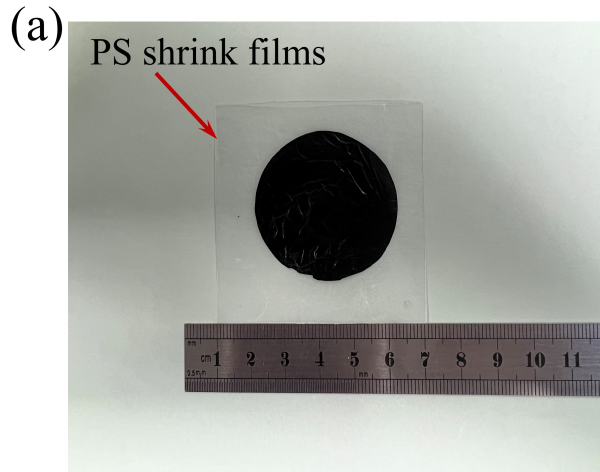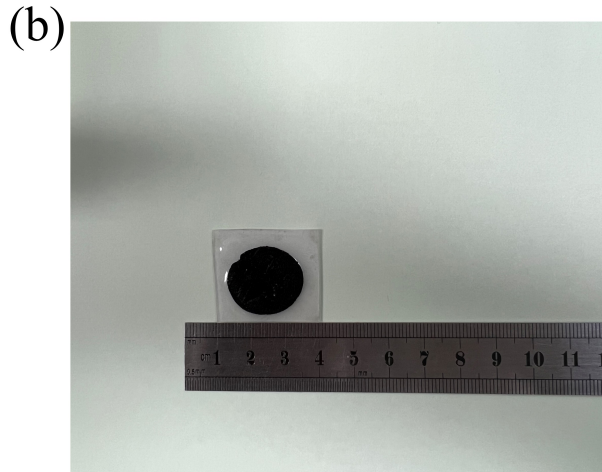

Supplement: d3nr05155b12.pdf [file d3nr05155b12.pdf]

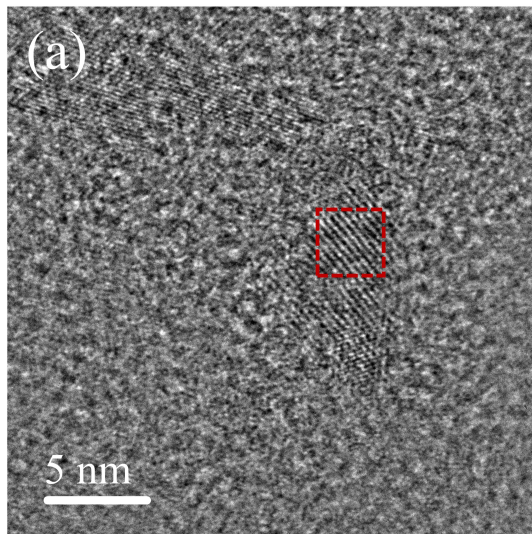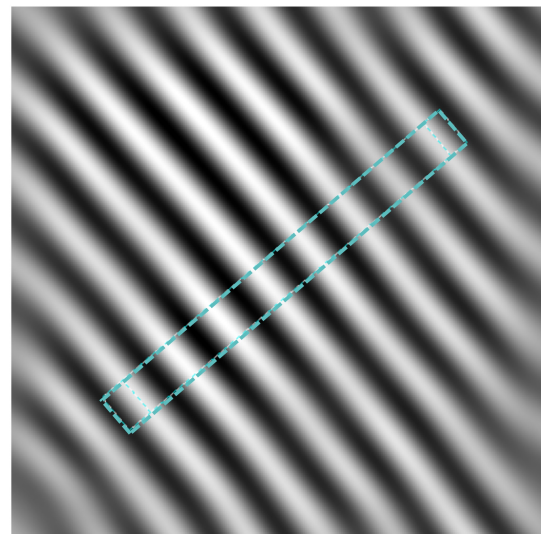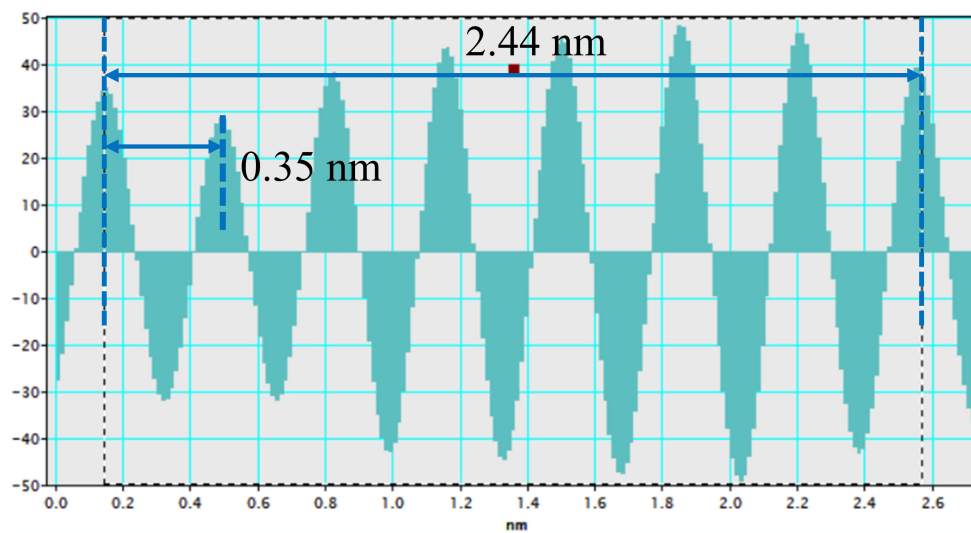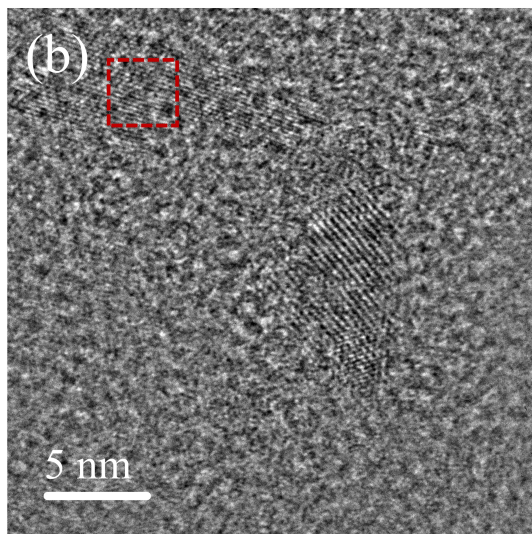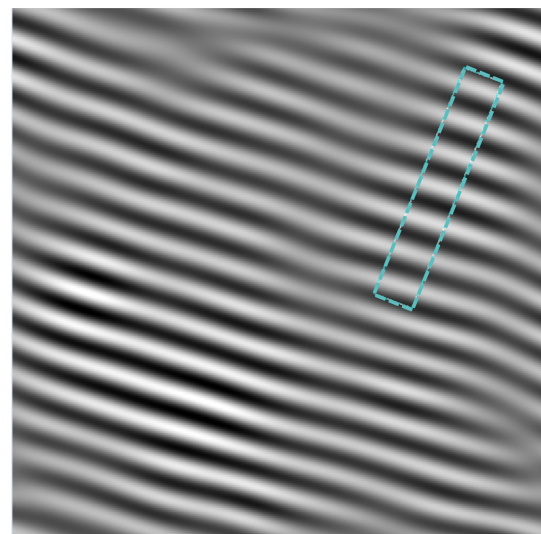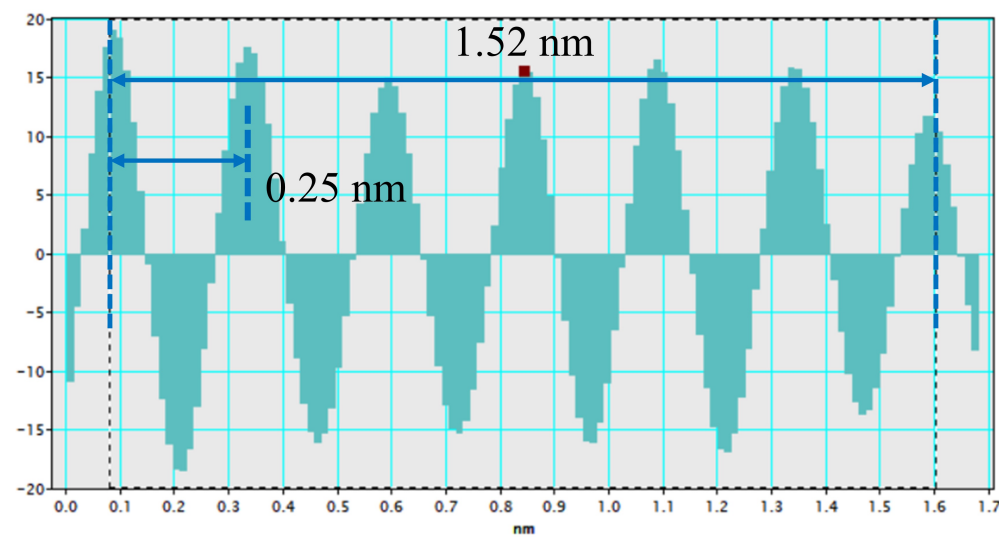

Supplement: d3nr05155b14.pdf [file d3nr05155b14.pdf]

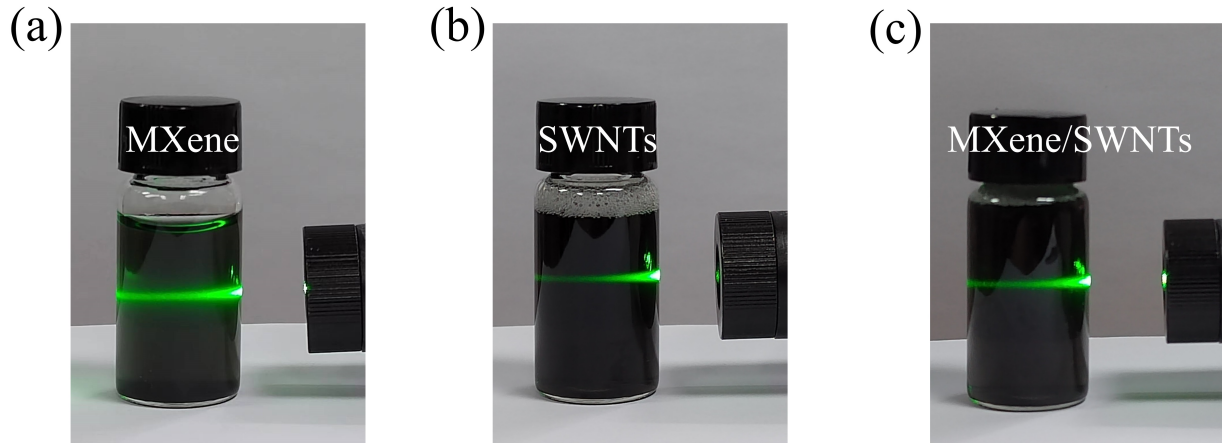

Supplement: d3nr05155b15.pdf [file d3nr05155b15.pdf]

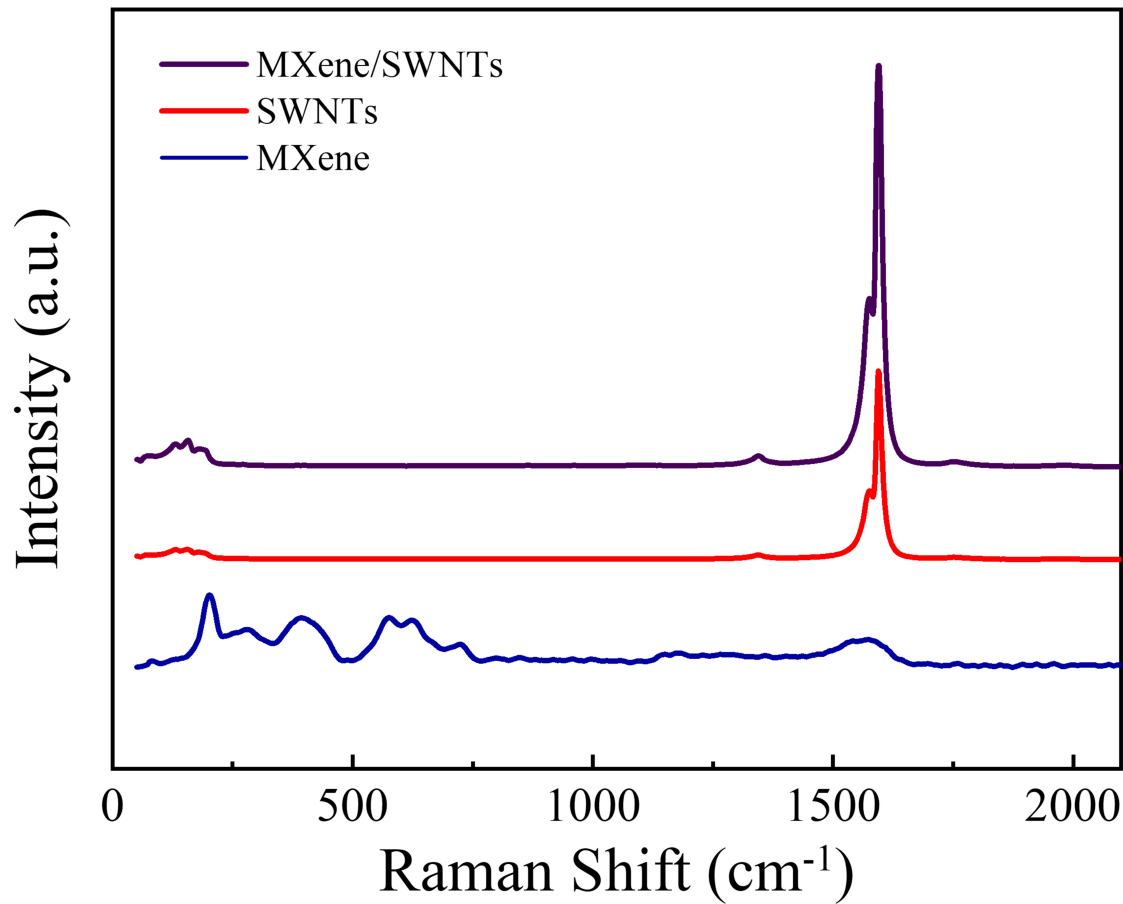

Supplement: d3nr05155b16.pdf [file d3nr05155b16.pdf]

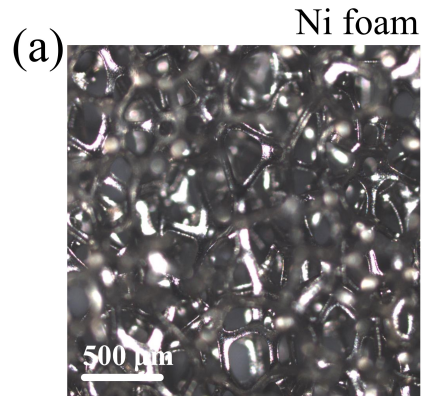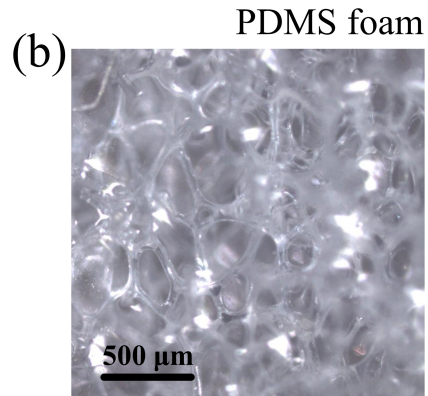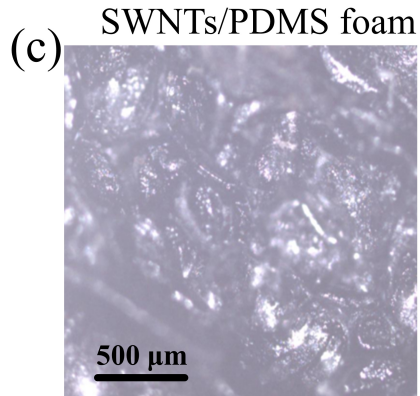

Supplement: d3nr05155b17.pdf [file d3nr05155b17.pdf]

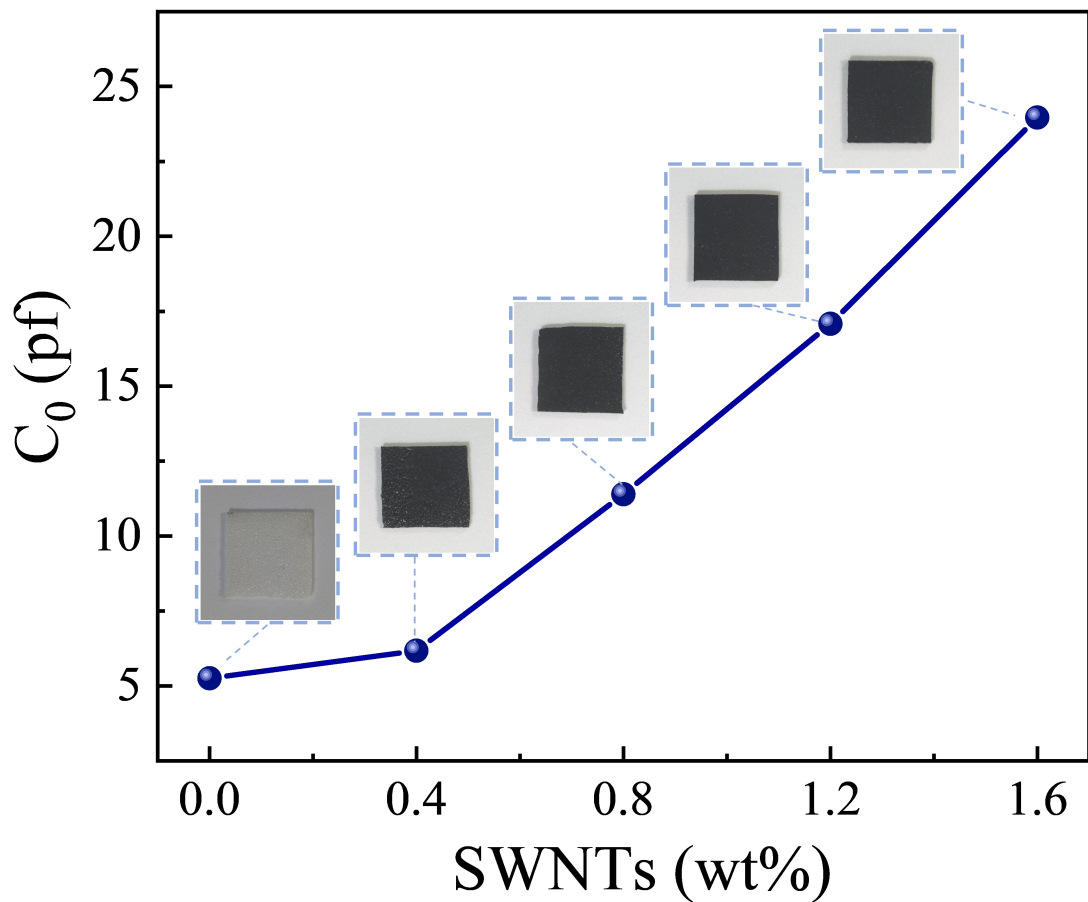

Supplement: d3nr05155b18.pdf [file d3nr05155b18.pdf]

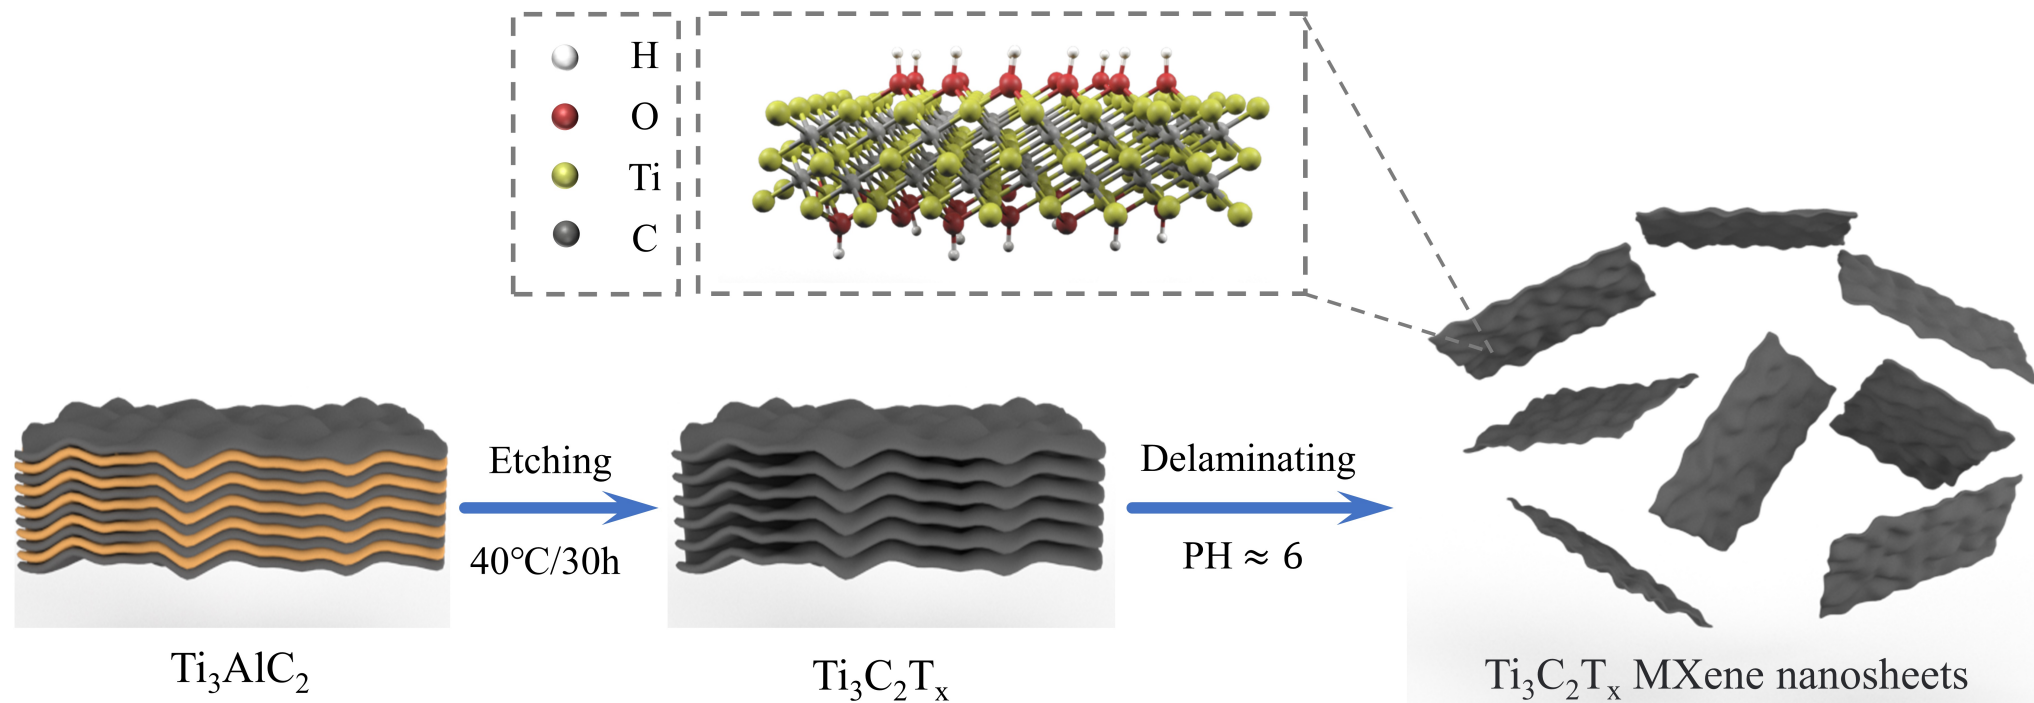

Supplement: d3nr05155b3.pdf [file d3nr05155b3.pdf]

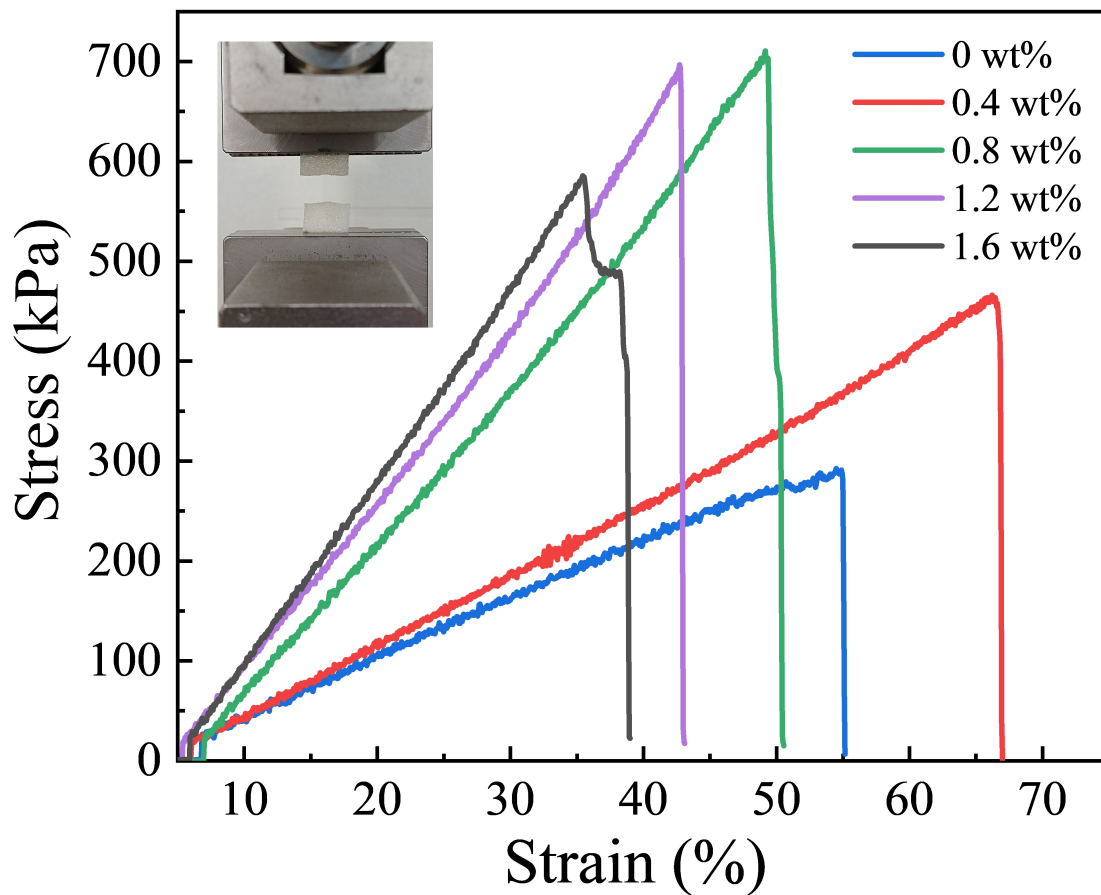

Supplement: d3nr05155b4.pdf [file d3nr05155b4.pdf]

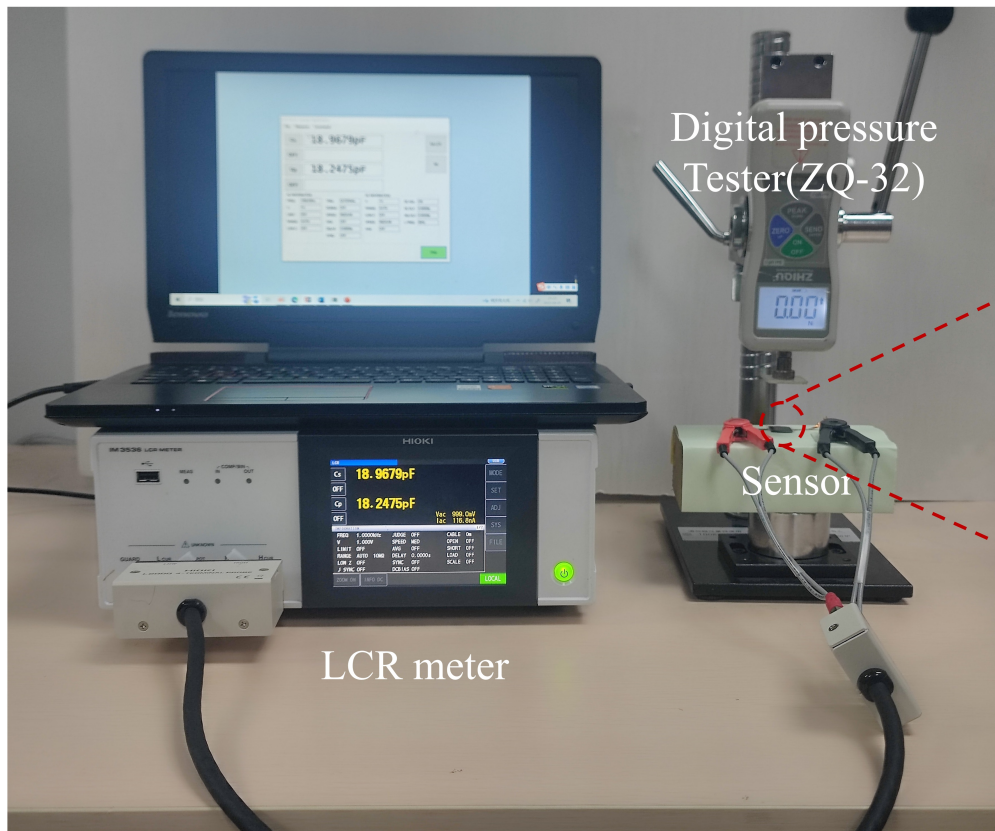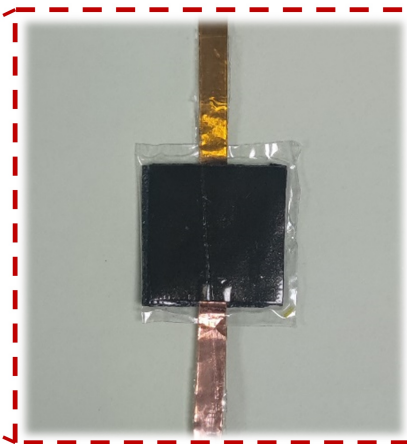

Supplement: d3nr05155b5.pdf [file d3nr05155b5.pdf]

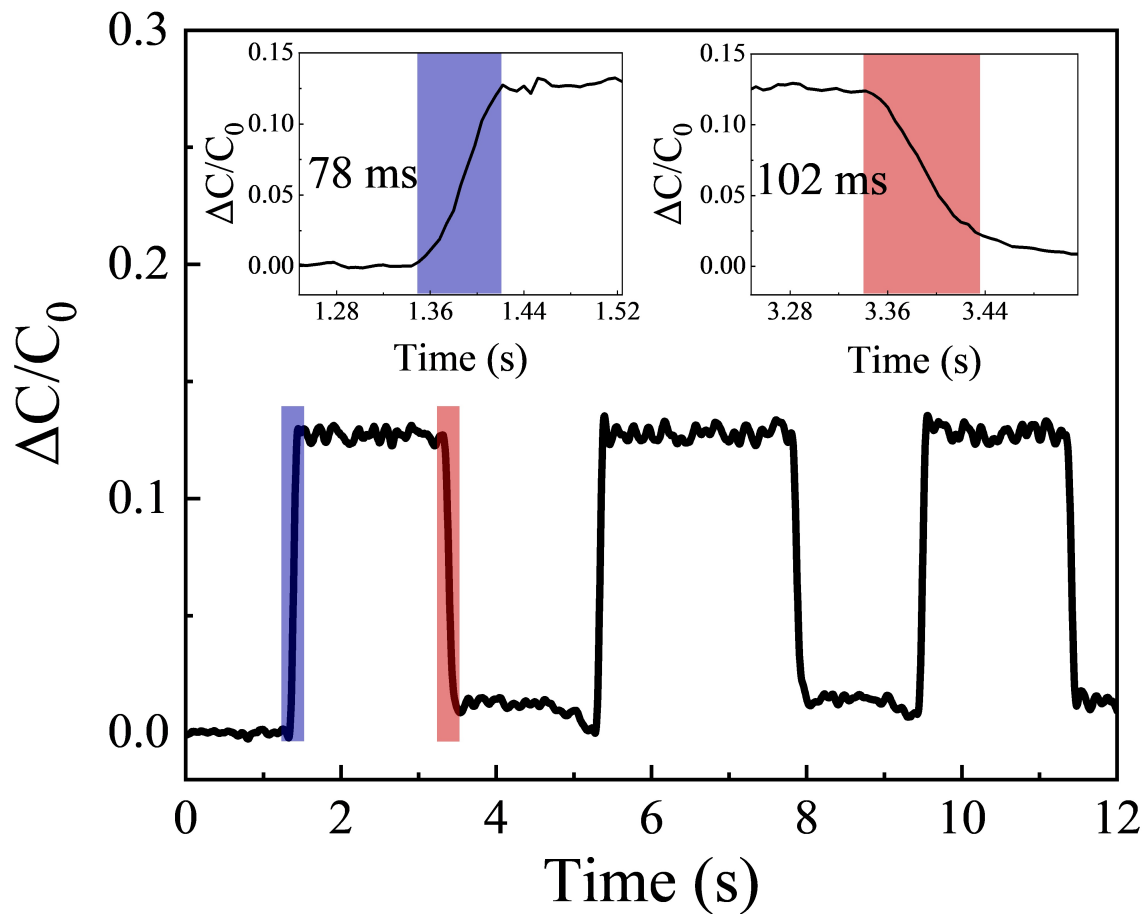

Supplement: d3nr05155b6.pdf [file d3nr05155b6.pdf]

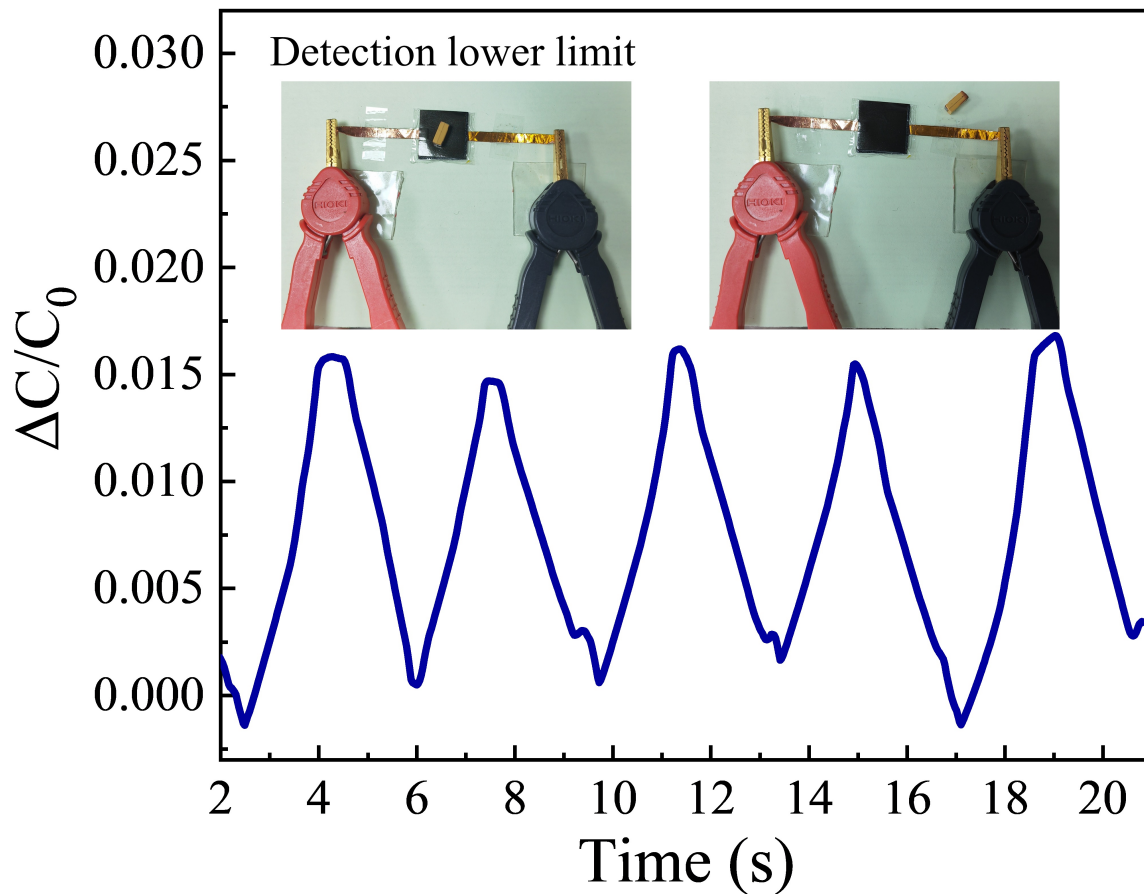

Supplement: d3nr05155b7.pdf [file d3nr05155b7.pdf]

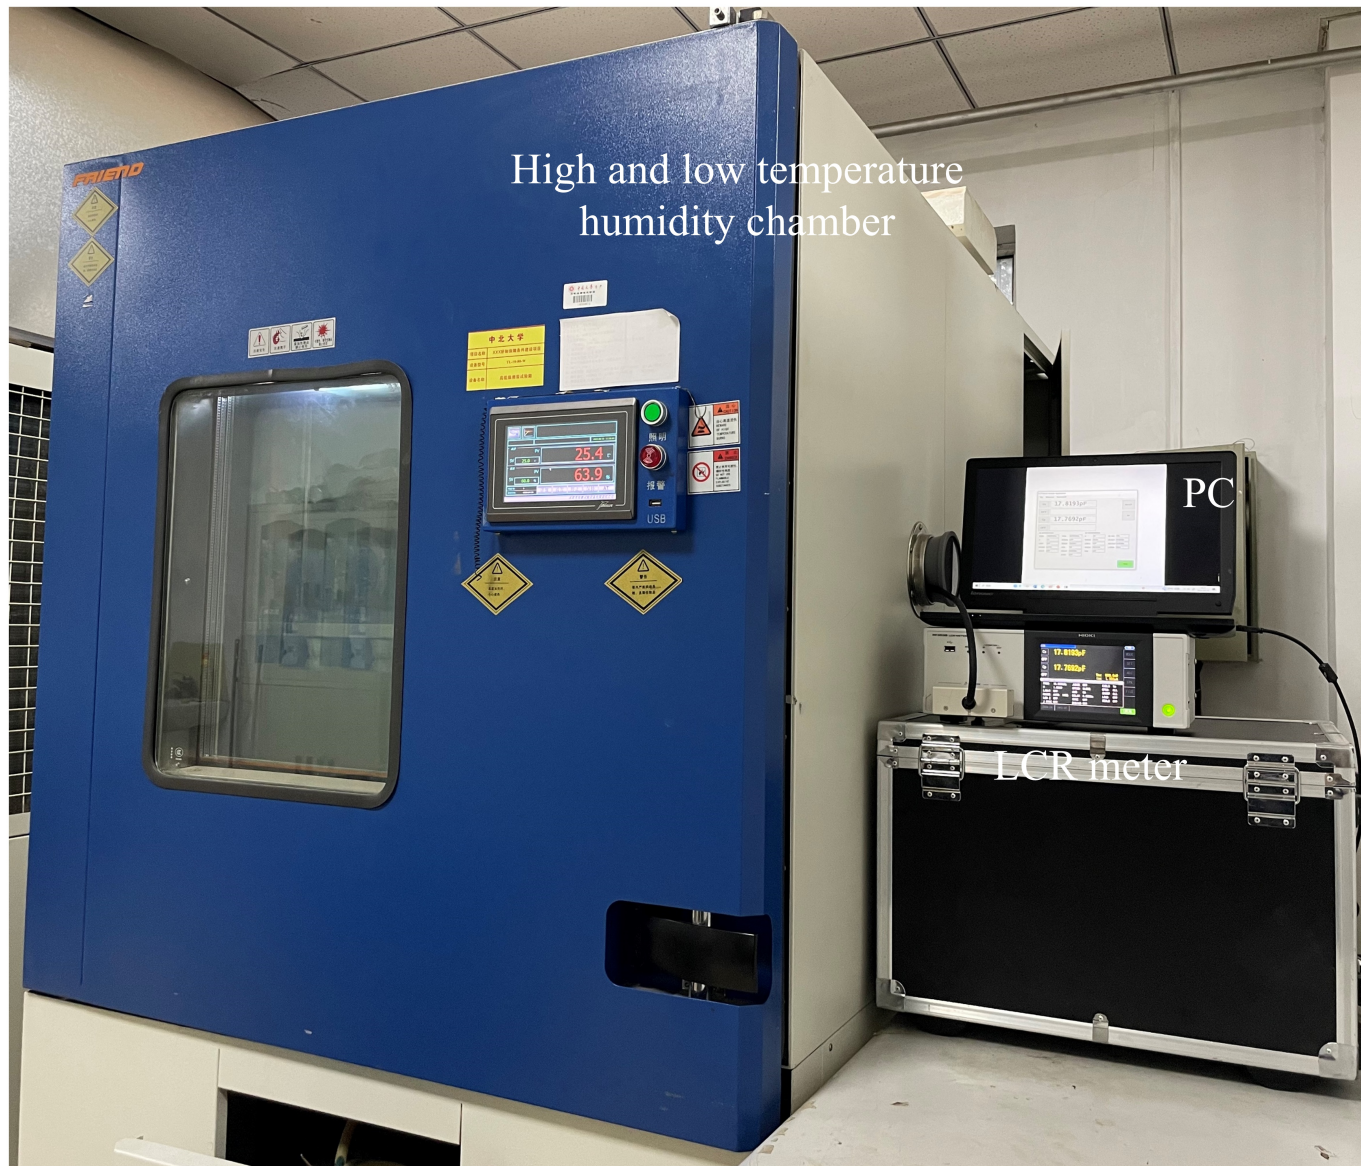

Supplement: d3nr05155b8.pdf [file d3nr05155b8.pdf]

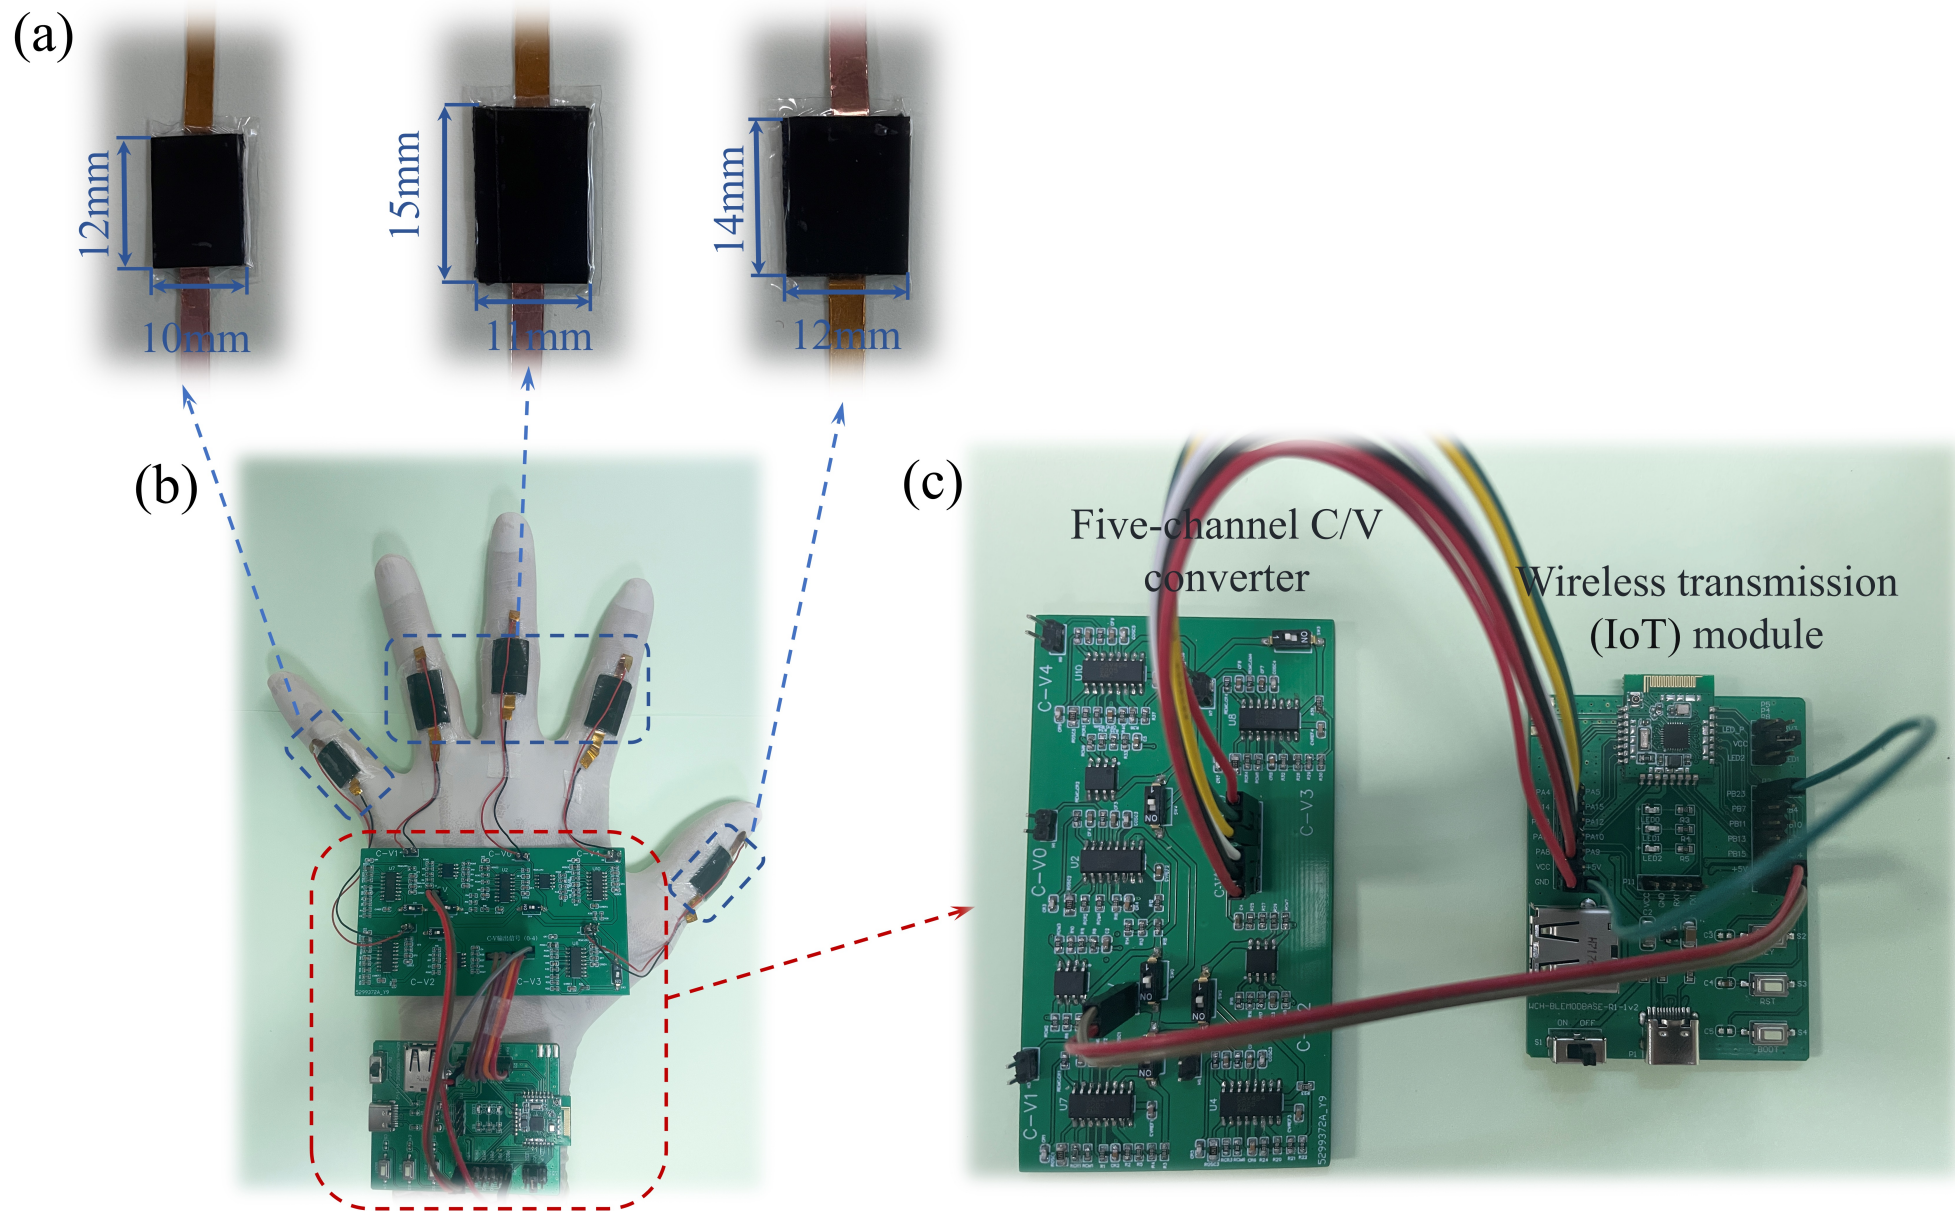

Supplement: d3nr05155b9.pdf [file d3nr05155b9.pdf]
